# Supplementary material for: Work, eat and sleep: towards a healthy ageing at work program offshore
Source: Springer Nature journal article supplement (doi:10.1186/s12889-016-2807-5), 2015-12-01
Supplement: MOESM1 [file 9751448]

**Additional file 1.** Self-constructed questionnaire items

| Constructs               | Questions                                                                                                                                                                                                                                                                                                                                                                                                                                                                                            |
|--------------------------|------------------------------------------------------------------------------------------------------------------------------------------------------------------------------------------------------------------------------------------------------------------------------------------------------------------------------------------------------------------------------------------------------------------------------------------------------------------------------------------------------|
| Ageing & Human Resources | <ul style="list-style-type: none"> <li>• At what age do you plan to retire?</li> <li>• Would you work longer if you would have one of the following options: (Flexible work hours, job sharing, part-time work, other)</li> <li>• With increasing age, it is important to me to: (Have more privacy, eat differently, have a good night's rest, stay in close contact with family and friends, other)</li> <li>• Have you been discriminated against due to your age in the last 12month?</li> </ul> |
| Work Functioning         | <ul style="list-style-type: none"> <li>• If you could give yourself a score, which score would you give yourself for your functioning at work?</li> <li>• How satisfied are you with your functioning at work?</li> </ul>                                                                                                                                                                                                                                                                            |
| Physical Environment     | <ul style="list-style-type: none"> <li>• In general, how would you rate the following environments? (Sleeping accommodations, ALQs/TLQs, canteen, recreation rooms, exercise facilities, your workplace, heliport)</li> </ul>                                                                                                                                                                                                                                                                        |
| Environmental stressors  | <ul style="list-style-type: none"> <li>• Please indicate how satisfied you are with the following environmental factors. (ventilation, illumination, temperature, noise, air pollution, motion of the platform, smell, interior of accommodation)</li> </ul>                                                                                                                                                                                                                                         |
| Social Environment       | <ul style="list-style-type: none"> <li>• How would you rate the social atmosphere on-board?</li> <li>• How would you characterize your working relationship with your colleagues?</li> <li>• Do you feel accepted by permanent staff? (for contractors)</li> </ul>                                                                                                                                                                                                                                   |
| Privacy                  | <ul style="list-style-type: none"> <li>• How satisfied are you with the (sleeping) accommodations?</li> <li>• How satisfied are you with your privacy situation offshore?</li> </ul>                                                                                                                                                                                                                                                                                                                 |
| Food Offshore            | <ul style="list-style-type: none"> <li>• In general, how would you rate the food, which is provided offshore?</li> <li>• How do you rate the food choice/variability, which is provided offshore?</li> <li>• How do you rate the food quality, which is provided offshore?</li> </ul>                                                                                                                                                                                                                |

|               |                                                                                                                                                                                                                                                                                  |
|---------------|----------------------------------------------------------------------------------------------------------------------------------------------------------------------------------------------------------------------------------------------------------------------------------|
|               | <ul style="list-style-type: none"><li>• How do you rate the preparation of food?</li><li>• How often do you eat a warm meal during a regular working day?</li></ul>                                                                                                              |
| Dips Offshore | <ul style="list-style-type: none"><li>• If you are offshore for 2 weeks, do you, at some point, experience a 'dip' (mentally and or physically)?</li><li>• During this 'dip' are you: mentally worn out; physically worn out or both mentally and physically worn out?</li></ul> |
