# Supplementary material for: Work, eat and sleep: towards a healthy ageing at work program offshore
Source: Springer Nature journal article supplement (doi:10.1186/s12889-016-2807-5), 2015-12-01
Supplement: MOESM2 [file 9751448]

**Additional file 2.** Interview participant characteristics

|                    | <b>Gender</b> | <b>Age</b> | <b>Department</b> |                   | <b>Gender</b> | <b>Age</b> | <b>Department</b> |
|--------------------|---------------|------------|-------------------|-------------------|---------------|------------|-------------------|
| Supervisors<br>[s] |               |            |                   | OIMs [o]          |               |            |                   |
| 1                  | Male          | 40         | Offshore          | <b>13</b>         | Male          | 53         | Offshore          |
| 2                  | Female        | 51         | Health            | <b>14</b>         | Male          | 42         | Offshore          |
| 3                  | Female        | 43         | HSE               | <b>15</b>         | Male          | 59         | Offshore          |
| 4                  | Female        | 35         | Health            | <b>16</b>         | Male          | 36         | Offshore          |
| 5                  | Male          | 58         | Health            | <b>17</b>         | Male          | 56         | Offshore          |
| 6                  | Male          | 54         | HR                |                   |               |            |                   |
| 7                  | Female        | 43         | HSE               | Workers<br>[wSSI] |               |            |                   |
| 8                  | Male          | 48         | Operations        | <b>18</b>         | Male          | n/a        | Offshore          |
| 9                  | Male          | 58         | HSE               | <b>19</b>         | Male          | n/a        | Offshore          |
| 10                 | Male          | 53         | HSE               |                   |               |            |                   |
| 11                 | Male          | 53         | Operations        |                   |               |            |                   |
| 12                 | Female        | 27         | HR                |                   |               |            |                   |

<sup>a</sup> HSE (Health Safety and Environment); HR (Human Resources)
