# Supplementary material for: Work, eat and sleep: towards a healthy ageing at work program offshore
Source: Springer Nature journal article supplement (doi:10.1186/s12889-016-2807-5), 2015-12-01
Supplement: MOESM3 [file 9751448]

### Additional file 3. Focus-group (FG) participant characteristics

| <b>FG AWG</b>     | <b>Age</b> | <b>Job</b>           | <b>Company</b> | <b>FG K15–A</b>   | <b>Age</b> | <b>Job</b>                    | <b>Company</b> |
|-------------------|------------|----------------------|----------------|-------------------|------------|-------------------------------|----------------|
| Worker 1          | n/a        | Fitter               | Contractor     | Worker 1          | 36         | Foreman                       | Contractor     |
| Worker 2          | n/a        | Fitter               | Contractor     | Worker 2          | 37         | Electrician                   | Contractor     |
| Worker 3          | 39         | SOT                  | NAM            | Worker 4          | 36         | Fitter                        | Contractor     |
| Worker 4          | n/a        | Fitter               | Contractor     | Worker 5          | 54         | Operations                    | NAM            |
| Worker 5          | n/a        | Mechanical           | Contractor     | Worker 6          | 52         | Process Operator              | NAM            |
| Worker 6          | n/a        | Process Safety       | NAM            | Worker 7          | 52         | n/a                           | Contractor     |
| Worker 7          | 32         | Operator, SOT        | NAM            | Worker 8          | 27         | n/a                           | Contractor     |
| Worker 8          | 33         | Operator             | NAM            | Worker 9          | 48         | Supervisor Maintenance        | NAM            |
| Worker 9          | 57         | Crane mechanic       | NAM            |                   |            |                               |                |
| <b>FG L2</b>      |            |                      |                | <b>FG K14–C</b>   |            |                               |                |
| Worker 1          | 32         | Foreman              | n/a            | Worker 1          | 48         | Assistant Platform Supervisor | NAM            |
| Worker 2          | n/a        | Isolation mechanic   | n/a            | Worker 2          | 32         | Offshore Setter               | Contractor     |
| Worker 3          | n/a        | Fitter               | Contractor     | Worker 3          | 33         | CET Supervisor                | NAM            |
| Worker 4          | 41         | Foreman              | Contractor     | Worker 4          | 45         | Project supervisor            | Contractor     |
| Worker 5          | 41         | Scaffolder           | n/a            | Worker 5          | 28         | Scaffolder                    | Contractor     |
| Worker 6          | n/a        | Scaffolder           | n/a            | Worker 6          | 41         | SOT                           | NAM            |
| <b>FG L13 (1)</b> |            |                      |                | <b>FG L13 (2)</b> |            |                               |                |
| Worker 1          | 39         | Welder               | Contractor     | Worker 1          | 42         | Construction Painter          | Contractor     |
| Worker 2          | 34         | Fire protection      | Contractor     | Worker 2          | 42         | Construction Painter          | Contractor     |
| Worker 3          | 32         | Steward              | Contractor     | Worker 3          | 38         | Construction Painter          | Contractor     |
| Worker 4          | 56         | Fire protection      | Contractor     | Worker 4          | 41         | Construction Painter          | Contractor     |
| Worker 5          | 64         | Supervisor           | n/a            | Worker 5          | 55         | Sr Instrument. electrician    | NAM            |
| Worker 6          | 57         | Operator             | NAM            | Worker 6          | 22         | Construction Painter          | Contractor     |
| Worker 7          | n/a        | E&I Maint & Operator | Contractor     | Worker 7          | 45         | Painter                       | Contractor     |
| Worker 8          | 44         | Chemical Analyst     | NAM            |                   |            |                               |                |
| Worker 9          | 47         | Fitter               | Contractor     |                   |            |                               |                |
| Worker 10         | 67         | n/a                  | Contractor     |                   |            |                               |                |
| Worker 11         | 40         | Fitter               | Contractor     |                   |            |                               |                |

<sup>a</sup>SOT (Senior Operation Technician ); E&I Maint (Electricity and Instrumentation Maintenance)
