# Supplementary material for: Work, eat and sleep: towards a healthy ageing at work program offshore
Source: Springer Nature journal article supplement (doi:10.1186/s12889-016-2807-5), 2015-12-01
Supplement: MOESM4 [file 9751448]

Additional file 4.            Chronic diseases

|                           | Total | < 45 years      | 45 – 54 years   | ≥ 55 years      | Difference<br>p-values |
|---------------------------|-------|-----------------|-----------------|-----------------|------------------------|
| Psychiatric disorders     | 1     | 1               | 0               | 0               | –                      |
| Diabetes                  | 4     | 0 <sup>ab</sup> | 1 <sup>ac</sup> | 3 <sup>bc</sup> | .010                   |
| Skin diseases             | 4     | 1               | 2               | 1               | –                      |
| Migraine                  | 6     | 3               | 2               | 1               | –                      |
| Asthma                    | 7     | 3               | 4               | 0               | –                      |
| Hearing problems          | 8     | 3               | 4               | 1               | –                      |
| Intestinal disorders      | 8     | 5               | 2               | 1               | –                      |
| Vision problems           | 9     | 3               | 4               | 2               | –                      |
| Cardiovascular disorders  | 13    | 1 <sup>b</sup>  | 5               | 7 <sup>b</sup>  | .001                   |
| Other disorders           | 18    | 8               | 3 <sup>c</sup>  | 7 <sup>c</sup>  | .049                   |
| Musculoskeletal disorders | 20*   | 4 <sup>b</sup>  | 6 <sup>c</sup>  | 9 <sup>bc</sup> | .001                   |

\* One participant had to be included for the subgroups analyses because we had no date of birth

a Significant difference between group < 45 years with group 45 – 54 years

<sup>b</sup> Significant difference between group < 45 years with group ≥ 55 years

<sup>c</sup> Significant difference between group 45 – 54 years with group ≥ 55 years
